# Supplementary material
Source: PubMed Central journal article supplement (PMC3823663)
Supplement: NIHMS494384-supplement-supplement_1.pdf [file NIHMS494384-supplement-supplement_1.pdf]

**Supplemental Table 1:** Sequences of primers used for qRT-PCR analysis of human adipose tissues

| Gene name       | Forward primer sequence (5'- 3') | Reverse primer sequence (5'- 3') |
|-----------------|----------------------------------|----------------------------------|
| cyclophilin A   | atggcactggcggcaggctcc            | ttgccattcctggacccaaa             |
| leptin          | tgacacaaaaccctcatca              | agcccaggaatgaagtcca              |
| angiotensinogen | gtcctgtctgccctgcaggc             | Aggctgtgaacacgcccacca            |
| PAI-1           | gacgaaccgccaatcgcaagg            | ctggaggcctgcgccacgta             |
| CD68            | gagcatcattctttcaccag             | cgatgatgagaggcagcaag             |
| IL-6            | ggtacatcct cgacggcatc            | ccagattggaagcatccatc             |
| TNF-alpha       | cgagtgacaagcctgtagcc             | gctggttat ctctcagctcc            |
| adiponectin     | ggtgagaaagg agatccagg            | ccttctccaggttctcctttcc           |
| resistin        | gctgttggtgtctagcaagacc           | ggccaatgtgtcttattgcc             |
| visfatin        | gcagaagccgagttcaacatcc           | gtactgcaaccataaaatactg           |
| MCP-1           | attcccaagggtcgcctca              | gcacagatctccttggccacaat          |

**Supplemental Table 2:** Adipocyte size and adipokine mRNA levels (mean  $\pm$  SE). Adipocyte size was measured as the mean cross-sectional area per cell ( $\mu\text{m}^2/\text{cell}$ ). All adipokine mRNA levels (in arbitrary units) are expressed relative to the respective cyclophilin A mRNA levels.

| Gene name       | Female SAT       | Female VAT      | Male SAT         | Male VAT        |
|-----------------|------------------|-----------------|------------------|-----------------|
| adipocyte size  | 3643 $\pm$ 183   | 2418 $\pm$ 148  | 4823 $\pm$ 367   | 3294 $\pm$ 297  |
| leptin          | 24.1 $\pm$ 3.8   | 6.9 $\pm$ 1.6   | 34.9 $\pm$ 4.0   | 12.5 $\pm$ 3.0  |
| angiotensinogen | 2.89 $\pm$ 0.36  | 3.09 $\pm$ 0.35 | 2.56 $\pm$ 0.21  | 3.15 $\pm$ 0.28 |
| PAI-1           | 1.87 $\pm$ 0.21  | 1.33 $\pm$ 0.21 | 3.17 $\pm$ 0.36  | 2.12 $\pm$ 0.28 |
| CD68            | 2.35 $\pm$ 0.29  | 2.24 $\pm$ 0.39 | 3.24 $\pm$ 0.65  | 1.47 $\pm$ 0.16 |
| IL-6            | 11.0 $\pm$ 2.2   | 10.0 $\pm$ 2.4  | 41.5 $\pm$ 13.1  | 23.4 $\pm$ 7.4  |
| TNF-alpha       | 1.46 $\pm$ 0.17  | 1.67 $\pm$ 0.75 | 0.88 $\pm$ 0.37  | 1.07 $\pm$ 0.20 |
| adiponectin     | 2.78 $\pm$ 0.30  | 3.86 $\pm$ 0.85 | 1.63 $\pm$ 0.37  | 1.78 $\pm$ 0.43 |
| resistin        | 3.51 $\pm$ 0.96  | 4.09 $\pm$ 1.08 | 2.47 $\pm$ 0.28  | 2.78 $\pm$ 0.76 |
| visfatin        | 4.89 $\pm$ 0.53  | 5.00 $\pm$ 0.68 | 7.55 $\pm$ 0.97  | 8.00 $\pm$ 1.45 |
| MCP-1           | 10.02 $\pm$ 2.71 | 6.82 $\pm$ 1.93 | 14.04 $\pm$ 4.82 | 7.57 $\pm$ 1.74 |
